# Supplementary material for: Assessment of the 11-year solar cycle signals in the middle atmosphere in multiple-model ensemble simulations
Source: Copernicus journal article supplement (doi:10.5194/egusphere-2024-1288), 2024-05-29
Supplement: Supplementary file [file egusphere-2024-1288-AC2-supplement.pdf]

Huo et al. explores a topic of 11-year solar cycle influence on the atmosphere through the top-down mechanism. Surface effects of such mechanism are very uncertain and have been largely disputed in a recent literature, and therefore the authors focus mostly on the middle atmospheric part of the story, where the forcing is created for further potential downward propagation. Authors aim to explore the potential reasons for multi-model uncertainties by looking at the solar signals in the middle atmospheric shortwave heating rates, temperature, ozone, and zonal winds, and by contrasting those to climatological biases of models. This is an interesting topic and the paper also uses a unique set of data (long-term large-ensemble three-model simulations), however it requires some major changes before it can be published.

Here are some major comments (some of them also appear later in the list of specific ones):

1. The paper states itself as an 11-year cycle study, however authors do not focus that much on the max-min differences but mostly on the 45-year means, which is rather representative of the grand minima type of variability.  
→ There is a bit of misunderstanding and we are sorry for the misleading texts. We did not use the 45-year means but calculated the correlation coefficients between a solar forcing index (F10.7 Index in this study) and meteorological variables (e.g., SWHR, temperature) in a “moving” 45-year window.
2. The paper mostly relies on the correlation analysis and seems to not exploit the full potential of the available data. Two out of three experiments are used only for a little bit, even though they are mentioned multiple times throughout the text in descriptions. In fact, I struggled to see where the LOWFREQ one is used at all.  
→ Yes. We mainly used the FULL to investigate the solar signals. It’s a pit that we cannot fully use up all the experiments as we expected when we designed them. We tried to include the LOWFREQ when we started this work, like using FULL minus LOWFREQ to reduce the influence of the low-frequency external forcings. However, it introduced an artificial signal, especially for the dynamic response. After discussion, we decided to mainly focus on the FULL and compared the results with FIX at some point to help interpret the results. The texts about LOWFREQ was removed in the revised version.
3. The main findings of the paper are straightforward (higher signals in the lower latitudes and higher altitudes, stronger signals during active phases, model dependent top-down mechanism, and potential causes for it in the model climatological biases), however the way the analysis is created to show this is overcomplicated. There are 12 figures in the main text and 9 in the appendix, while most of them (and related text) show statistically insignificant results or pure empty space, and the text discussing them is way too technical. It looks more like a report rather than a paper aimed at conveying a clear message and findings to the reader. All this can be substantially shortened.  
→ Thanks for the comments. We re-plotted some figures and revised the manuscript accordingly.
4. In the same direction but specifically about the figures: the amount and use of figures needs to be critically reviewed by the authors in a way that figures serve the story and not that the text just describes many similar plots. Also, the choice of Figures in the main

text vs the appendix is sometime confusing. For example, you have almost half of a big paragraph discussing Figure A2, while Figure 7 shows the same as Figure 6 but at a different level and is mentioned in just one sentence. Figures 9 or 11 are just full of empty space.

→ Revised.

Specific comments:

Title: you analyze only the NH extended wintertime, consider reflecting it in the title somehow

→ Revised.

I25: "upward" -> "upward-propagating"

→ Revised.

I35: comma is missing after "The "top-down" mechanism"

→ Revised.

I50: "much larger than the" -> "much larger than of the"

→ Revised.

I53: "the dynamics and the uncertainty of the model" - sounds too vague, please rephrase

→ Revised.

I63 and I65: "upper middle atmosphere" and "lower middle atmosphere" sound odd, as you haven't defined the middle atmosphere boundaries and its lower and upper parts. Consider using "upper stratosphere/lower mesosphere" and "lower stratosphere" instead.

→ Thanks for the suggestion. The texts were revised.

Section 2.1: It is worth noting that all three models used are of the ECHAM family. There also have been papers intercomparing ECHAM5 and ECHAM6 GCMs, as well as the performances of their (original and modified) radiative transfer schemes, which would be useful in the interpretation of the SWHR and temperature signals.

→ Thanks for pointing this out. We added a discussion in the revised version. **Please see lines 169-182.**

I93: Explain what is SOLCHEK, it is not described anywhere.

→ We added a link to the website for the SOLCHECK project in its footnote, though it's in German.

I104: Describe what ozone is used in MPI-ESM-HR and how it is treated in the three experiments

→ Ozone concentrations from the CMIP6 are used and ozone is treated inactively. A description is added in the revised version. **Please see lines 112-113.**

Section 2.2: You list three experiments together, and it is expected therefore that all of them will be heavily used during the analysis (e.g., as differences between them). However, the FIX and the LOWFREQ ones are used only for a tiny bit. Please highlight that the paper mostly relies on the FULL one and the others are used only for small specific purposes. It is also unclear why you don't look at the classical differences between the experiments and just rely on the correlations of filtered data instead, given also how much statistics you would have with all the ensemble members. FULL-FIX would give you long-term trend + 11-year signal, while FULL-LOWFREQ would give you the 11-year signal, i.e. you would be able to extract both the long-term variability and the 11-year signal without a need for correlations or multi-linear regressions. You are free, of course, to choose what to analyze and what methodology to try, but to me it looks a bit like a missed potential!

→ Thanks for the suggestion of the method! That's exactly what we planned when we designed the experiments, i.e., we expected to distinguish the "long-term trend+11-year solar signal" by FULL minus FIX, and the "11-year solar signal" by FULL minus LOWFREQ". However, when we performed this strategy of the method on the outputs of each model, it seemed more artificial signal to be introduced than the signal should be extracted. The possible reason is that the ensemble size in this study is not large enough to ensure the low-frequency signal or internal variability is correctly removed. After discussion, we prefer to focus on the FULL experiment to explore/re-examine the signal of the 11-year solar cycle and its stability across the history period based on multiple models. We clarified this point in the revised manuscript. **Please lines 124-125.**

l125: how do you justify a 45-year running window? It basically gives you an average over 4 adjacent solar cycles, but it also greatly decreases the overall signal, given that you average solar min and max years together. This also contradicts the title and the main motivation of the paper, which were stated for the 11-year cyclicity. In your case, for most of the paper you rather explore the long-term variability, i.e. your results are much closer to the grand minima impacts set-up than to the question of how the 11-year cycle modulates the atmosphere, even though the mechanisms are similar.

→ As we replied above, it seems our texts led to a misunderstanding. We didn't average over the 45-year window but calculated the correlation coefficients between meteorological variables and the solar cycle index (the F10.7 here) in the 45-year running window. Indeed, it reduced the overall signal as only 4 adjacent solar cycles were involved in each window. However, following the method used in the work of Drews et al. (2022) and Chiodo et al. (2019), changes in the correlation coefficient between a meteorological variable (e.g., temperature) and the F1.7 index in the 45-year windows moving across the whole data period, can show us the stability of the relationships somehow. **Please see lines 131-134.**

Drews, A., Huo, W., Matthes, K., Kodera, K., and Kruschke, T.: The Sun's role in decadal climate predictability in the North Atlantic, *Atmos. Chem. Phys.*, 22, 7893–7904, <https://doi.org/10.5194/acp-22-7893-2022>, 2022.

Chiodo, G., Oehrlein, J., Polvani, L. M., Fyfe, J. C., and Smith, A. K.: Insignificant influence of the 11-year solar cycle on the North Atlantic Oscillation, *Nature Geosci.*, 12, 94–99, <https://doi.org/https://doi.org/10.1038/s41561-018-0293-3>, 2019

1138: why do you use 90% here and not 95% as for the correlation coefficient?

→ Although some previous studies show both 90% and 95% significance levels (like Figure 4 of Thiéblemont et al (2015) and Figure 2 of Kuroda, et al., 2022), the solar signal is weak, especially the dynamic responses, only a few regions can pass the 95% significance level. It's a similar situation in our current study, as shown Figure. R1 (below). To facilitate comparisons among models as well as with our previous study (Drews et al., 2022), we use the 90% significance level for the composite.

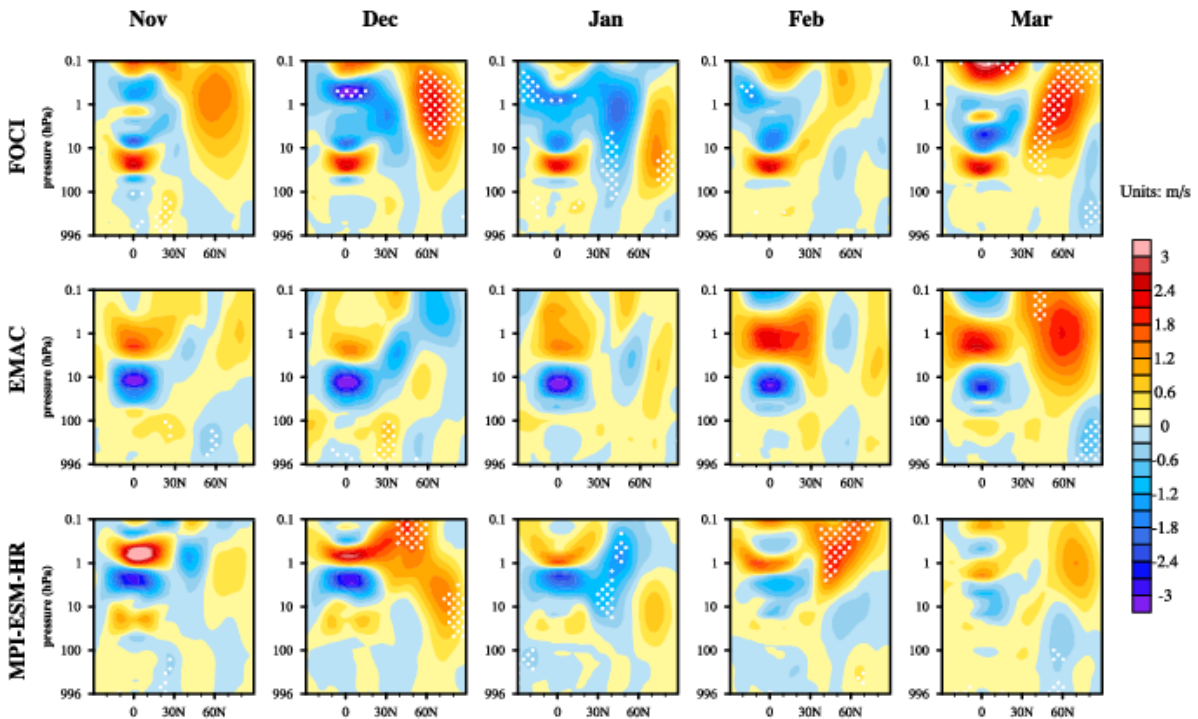

**Fig. R1.** Composite differences between solar maxima and minima of the ensemble mean zonal-mean zonal wind anomalies (units:  $\text{ms}^{-1}$ ) in the FULL experiment for FOCI (top), EMAC (middle), and MPI-ESM-HR (bottom). The 95% significance level for the composite of zonal-mean zonal wind anomalies is indicated by white dots (black hatching) based on a 1000-fold bootstrapping test.

1147: "in the tropical region" - it not only the tropics, but all sunlit regions with the strongest effects in the tropics. Please rephrase, otherwise it reads like the effects are present only in the tropics

→ Revised. **Please see line 162.**

Figure 1: Please simplify the x-axis title (e.g., why do you need "10.7cm" there?). "F10.7 index (sfu)" or "Solar radio flux (sfu)" would suffice.

→ Revised. We used the F10.7 index (sfu) as the x-axis title.

L151-152: Why do you use annual mean for SWHR and T but DJF-mean for F10.7?

→ Thanks for pointing this out. The DJF-mean F10.7 is replaced by the annual mean F10.7 in the revised version.

L159: why do you use 10hPa for ozone? According to all previous studies it maximizes rather around 5 hPa, i.e., between 1 and 10 hPa or 35-40 km depending on a study (Maycock et al., 2018 <https://acp.copernicus.org/articles/18/11323/2018/>; Ball et al., 2019 <https://agupubs.onlinelibrary.wiley.com/doi/full/10.1029/2018GL081501>; Dhomse et al., 2022 <https://acp.copernicus.org/articles/22/903/2022/>)

→ Yes, the maximum response in the ozone depends on the model used, which is between 7 hPa and 10 hPa in the annual mean ozone mix volume for the three models used in this study. There is no special reason for using the 10 hPa for ozone here. Still, all three models show a significant ozone response at 10 hPa in the annual mean tropical averaged profile (Figure 1), which is more pronounced in the winter months (i.e., reaches maximum at 10 hPa, as shown in Figure 1). So, focusing on 10 hPa for the ozone response makes sense and simplifies the comparison with the dynamical response later on (i.e., zonal wind at 1 hPa and 10 hPa).

L160-165: these periods of non-linearity at  $f_{10.7} > 200$  sfu look very interesting. Given that these are not so many data points, why don't you provide the periods specifically? This will simplify potential explanations with other forcings.

→ This comment is a bit confusing. We are not sure about what the “periods” you mean here because Lines 160-165 refer to the scatter figure (Fig. x in the revised version). If we understood the comment in the right way, there are just 6 years (scatter squares/dots) for  $F_{10.7} > 200$  sfu which could be of the solar cycle 19 (i.e., the largest solar cycle in our study period back to 1850). The solar signal will be covered by the large internal variability and inter-annual variability with a very short data period (i.e., 6 years here), and it's hard to find a decadal signal with a statistical method. In our study, we compared the features of the “FULL” experiments with the “FIX” ones to interpret the results.

Figure A2: Please add uncertainty estimates to your lines (either over the ensemble or over the period)

→ We added the spread over the period (shadow regions) into the figure to indicate the response to different strengths of the solar forcing (solar cycle amplitudes).

L169: Again, here it could be useful to discuss the related performances of the radiative transfer codes (e.g., Sukhodolov et al., 2014 <https://gmd.copernicus.org/articles/7/2859/2014/>; Nissen et al., 2007 <https://acp.copernicus.org/articles/7/5391/2007/> and others)

→ Thanks for the suggestion and references, we added a discussion in the revised version. **Please see lines 167-182.**

I178-180: It looks like the T-correlation is lower than the SWHR one everywhere and not only during 1850-1920

→ Sorry for the misleading texts. We re-wrote the sentences. **Please see lines 204-206.**

I192: How can you achieve more than one correlation coefficient between two time-series? What do you mean here?

→ Sorry for the misleading sentences. We explain it here: There's just one correlation coefficient between the time series of F10.7 and the time series of a meteorology variable (take the SWHR anomaly as an example) in each 45-year window. We got 121 windows running from 1850 to 2014 and hence 121 correlation coefficients in total. Then, we plotted a scatter diagram of the correlation coefficients and the solar cycle amplitudes for all 121 windows, as shown in Fig.3. The solar cycle amplitudes are identical in some windows, while the correlation coefficients between the F10.7 and the SWHR anomalies in these windows are different. Therefore, Figure 2 demonstrated that we could have two or more correlation coefficients at an identical solar cycle amplitude for the F10.7 index and SWHR anomaly. We rewrite the sentences to avoid misleading. **Please see lines 217-220.**

Figure 2 and further: not clear what does CCR mean.

→ Sorry for the missing information. The "CCR" stands for "correlation coefficients in a running window". An explanation is added in the method section. **Please see line 131-133.**

Figure 2 and further: I understand that the relation gets unlinear under high SDs, but how or why do you get two lines over the same SD periods there? Why the shading so weird there and often completely de-attached from the ensemble mean line, while it is stated as ensemble spread, which suggests that the ensemble mean should be somewhere in the middle... Sorry it is a very confusing plot and you need to carefully introduce it to the reader, given that similar plots are used for the rest of the paper

→ Sorry for the confusing figure, and thanks for pointing it out. A linear method was used to find the boundaries of the ensemble spread, which failed when more than two boundaries appeared. The figures are updated after we modified the codes.

Large dots in Fig. 3 indicate the correlation of the ensemble mean temperature (also the SWHR and O3) anomalies with the F10.7 index, not the ensemble mean of correlations of single ensemble members with the solar index. As the ensemble mean method can reduce the "noise" of internal variability and therefore extract the solar signal to some extent, we got a higher correlation coefficient between the ensemble mean temperature and the F10.7 than the individual members. This result is similar to the work of Drews et al., 2022 (Fig. 5d as an example). We modified the texts to avoid the misleading. **Please see lines 221-223.**

I197-200: Why do you say that the FOCl correlations are robust if all of them are below your significance threshold? Also, for the other two models most of them are also positive and non-significant, therefore I don't see how you can contrast FOCl to the other two.

→ Thanks for the good point. We revised the interpretations. **Please see lines 224-231.**

l215-216: I don't see much of a stat-significant warming at tropical 70 hPa. Also how would you explain stat-significant areas in the troposphere? Is it an artifact of 90% instead of 95%?

→ No, the warming response at the tropical 70 hPa doesn't pass the significant test (both 90% and 95%) in this study. The stat-significant areas in the troposphere show up for both 90% (Fig. 6 in the manuscript) and 95% (Fig. R2 below) significant levels. We also repeated the test with a 5000-fold bootstrapping, only an ignorable changing happened in the stratosphere. and the stat-significant areas in the troposphere are the same as the current figure. Therefore, it's not an artifact of 90% instead of 95%. But we hard to explain where it come from and the warming is so weak.

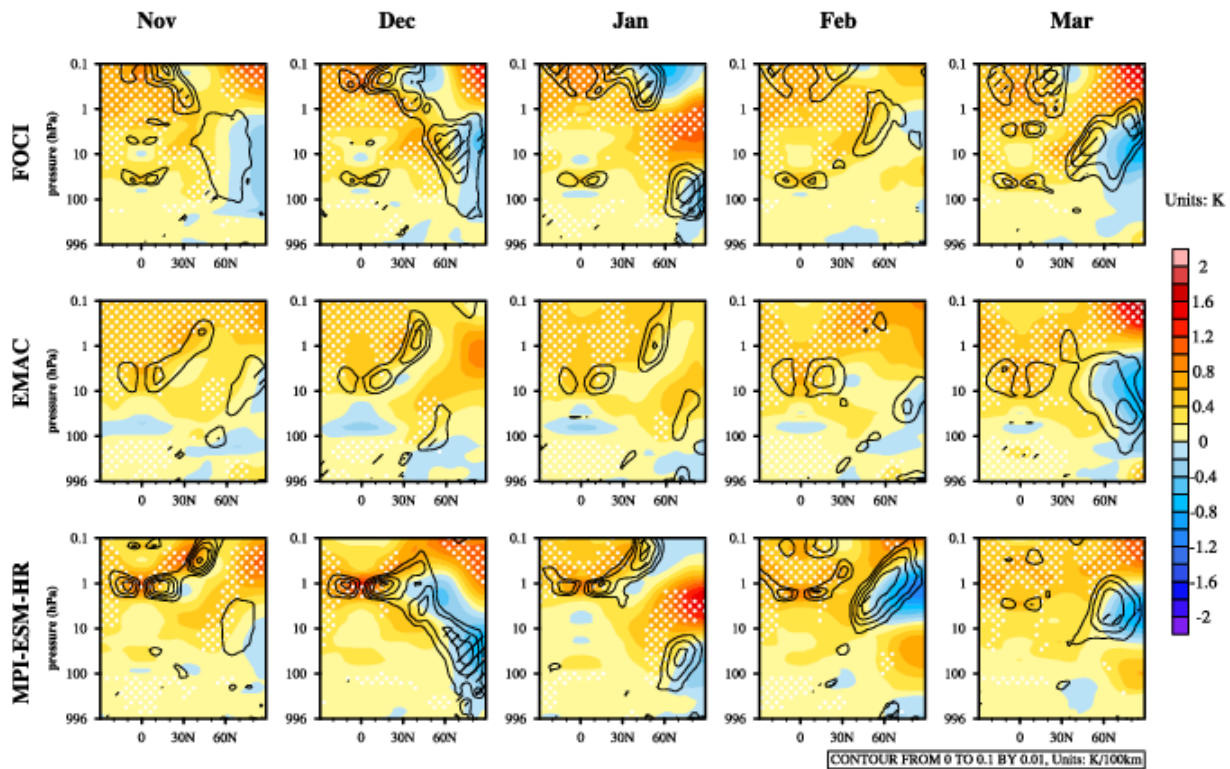

**Fig. R2.** The same as Fig. R1, but for the ensemble mean zonal-mean temperature anomalies (Units: K, color shading contours) and the poleward meridional temperature gradients (Units:  $K(100km)^{-1}$ , contours).

Figure 4: Why the countours get interrupted in the EMAC and MPI-ESM cases?

→ It's due to the values being too close to 0. We fixed it by releasing the 0-values before plotting.

l217: Note that the 11-year cycle-related lower-strat warming has been heavily disputed (Chiodo et al., 2014 <https://acp.copernicus.org/articles/14/5251/2014/>; Kuchar et al., 2017 <https://agupubs.onlinelibrary.wiley.com/doi/full/10.1002/2017JD026948>)

→ Thanks for the references. We added a short discussion about the second warming response in the lower-stratosphere. **Please see lines 244-250.**

I238: “statistical top-down propagation” – did you mean statistically significant?

→ Yes. We re-write it.

I250-252: do you associate all stat-significant areas in the troposphere as resulting from the top-down propagation? Or only those around the midlatitude jet?

→ The change in the midlatitude jet is a direct result of the meridional temperature gradient from the stratosphere to the troposphere. The subtropical jets in the troposphere could be related to the changes in tropospheric circulations.

I251-253: you don't show this, so please mark as “(not shown)”

→ Revised.

Figure 7: This figure shows the same as Fig 6, but for a different level, almost nothing in it is statistically significant, and you mention it in one sentence only. Given that the figure occupies more than half of the page, it doesn't look worthy to have it in the main text.

→ It's moved to the supplementary figures.

Figures 8-12: these are big figures with lots of empty space and marginal stat significance. Please find a way to replot what you want to show (signal dependencies on model biases) in a more condensed way. Otherwise it is a waste of space and complication for a reader.

→ Thanks for the suggestion. We replotted the figures by taking the models' biases as the x-axis.

I274: please specify the period used for ERA5. Also, it doesn't look correct that you compare the ERA5 climatology, shown as one line, to the spread of transient model points and treat it as biases. If you want to show model climatological biases, it will be much clearer to just add a lat-pressure figure to the appendix with models minus ERA5 for T and U. Also, there have been many papers validating these models, so it is necessary to verify if your biases are consistent with those reported in the literature.

→ We used the period of 1950 to 2014 for ERA5. We compared the models' climatology of temperature (zonal wind) with the ERA5 and added the lat-pressure figures in the supplement. Please see Fig. A7 and Fig. R3 below. Both FOCI and EMAC models have a small warm bias in the upper stratosphere (close to 1 hPa) over the North Pole (Figs. R3a and b). MPI-ESM-HR has a large warm bias in the whole stratosphere from the subtropical to the north Pole region (Fig R3c). EMAC and MPI-ESM-HR have a tropical cold bias, especially in the upper stratosphere (Figs. R3b and c). The stratospheric zonal winds over the polar vortex region are stronger in FOCI than ERA5 (Fig. R3d). Both EMAC and MPI-ESM-HR simulate much weaker stratospheric zonal winds than the ERA5 and therefore much weaker polar night jets in these two models (Fig. R3e and f).

→ We didn't compare the ERA5 climatology (i.e., an average of 1950-2014) with the transient model points but with the average value of the data in a 45-year window. For example, each dot in Fig. 3 indicates the average temperature in a 45-year window. As the 45-year window moves from 1850 to 2014, we have 121 “climatological” values for 121 windows. In our



manuscript, we investigated the possible impacts of models' biases on the solar signal in the polar night jet anomaly, including the biases in the wind speed averaged over 60-65°N at 1hPa (10hPa), tropical stratopause temperature averaged over 25°S-25°N at 1hPa (10hPa), and the North Pole temperature averaged over 65°N-90°N at 1hPa (10hPa). Here we must notice that the climate states in the 45-year windows could shift among the historical periods (e.g., different temperature climatology of the 45-year window in the early period from in the late period). When we compared all of them with the ERA5 climatology (averaged over 1950-2014), the differences, which we named as model biases, changed in the history period, as shown in Fig. R4 (below). For example, the warm bias of the tropical stratopause in MPI-ESM-HR in the earlier period decreases and turns into cold bias in the late period. As Figs.R3c shows cold bias in the tropical stratopause in MPI-ESM-HR for the common period of 1950-2014, we think the warm bias in the earlier period could be just an overestimation due to the different climate states. EMAC has a large cold bias in the late period (about -6K), which is smaller than 1K before 1900. We add sentences to discuss this point in the manuscript. **Please lines 140-143, lines 320-325, lines 340-342.**

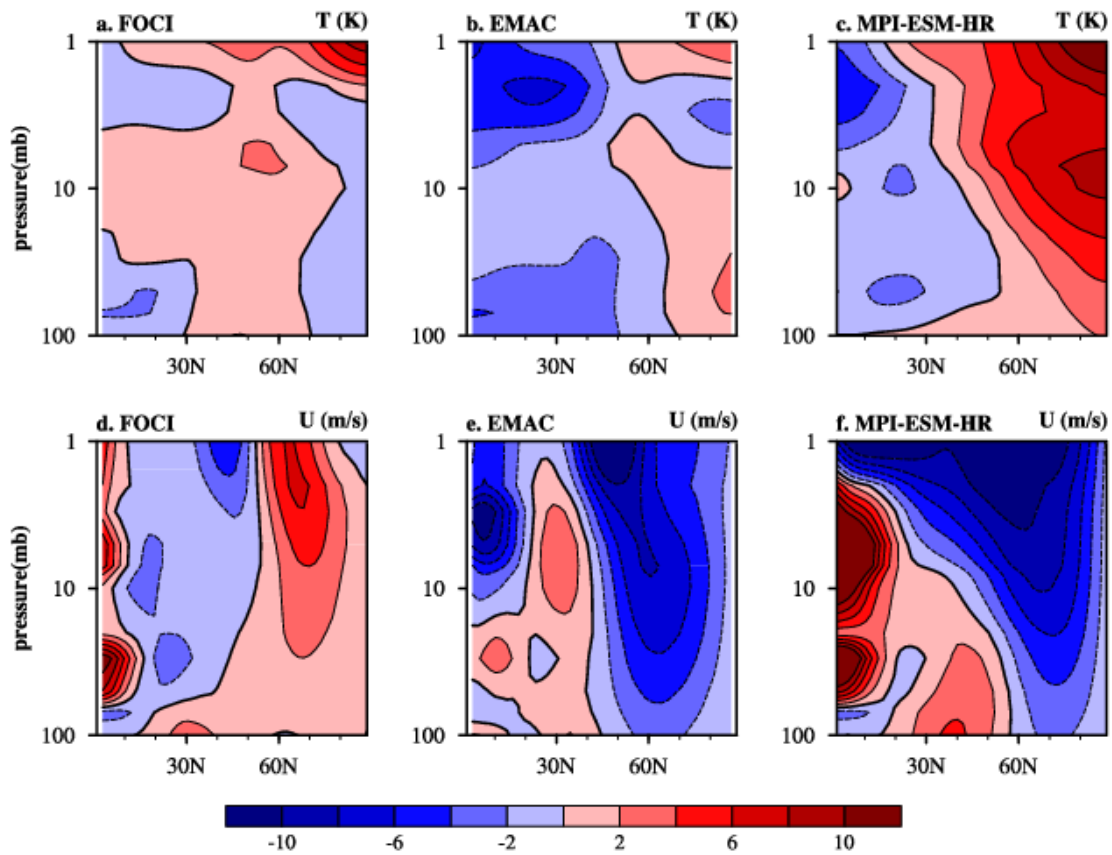

**Fig. R3. First row:** Differences in the zonal mean temperature climatology (K) between models (a. FOCI; b. EMAC; c. MPI-ESM-HR) and ERA5. **Second row:** The same as the first row, but for the zonal mean zonal wind climatology (m/s). The climatology here is defined by the mean value of 1950-2014.

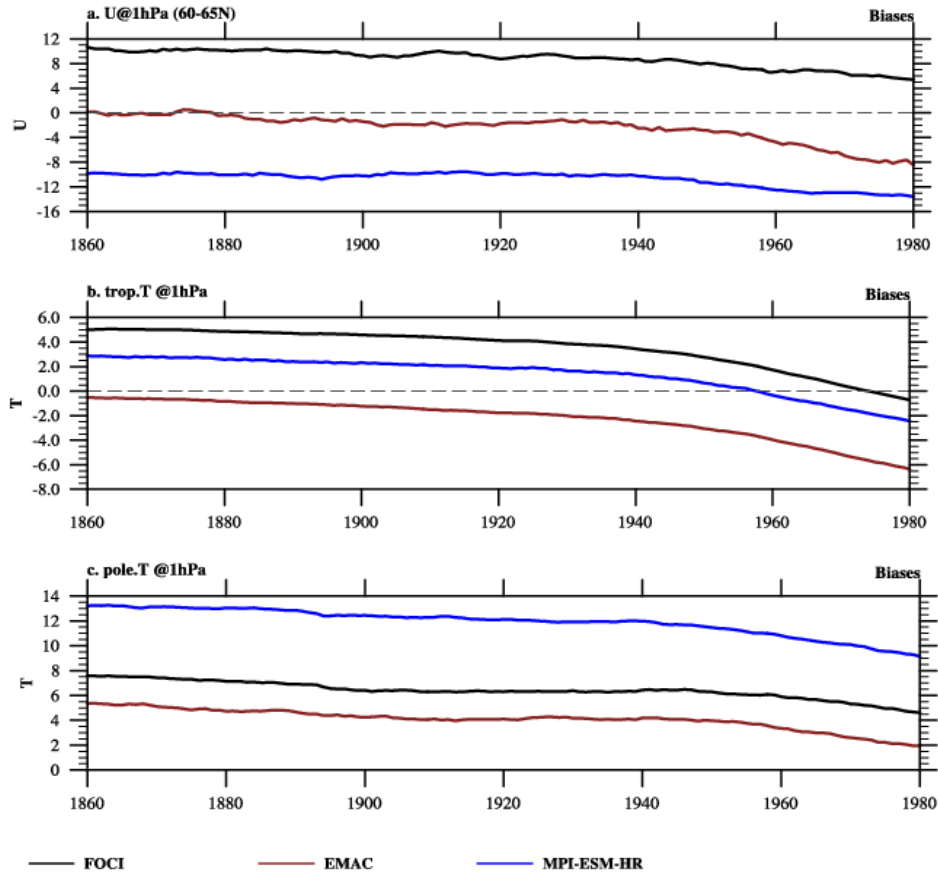

**Fig. R4.** (a.) Differences of the simulated (FOCI (black), EMAC (brown), MPI-ESM-HR (blue)) ensemble-mean zonal-mean zonal wind climatology at 1 hPa (m/s) averaged over the 60-65N and a moving 45-year window from ERA5 climatology of 1950-2014. (b) is the same as (a), but for the tropical stratopause temperature climatology (K), i.e., averaged over 25S-25N and at 1 hPa. (c) is the same as (a), but for the stratopause temperature climatology (K) averaged over the North Pole (65-90N, 1 hPa).

I288 and I290: “EAR5” -> “ERA5”

→ Revised.

Table 1: “EAR5” -> “ERA5”. Also, “December dT” is rather a title for the whole table, while the first-row first-column place should for “level”

→ Thanks for the suggestion. We modified it.

I290-291: how are you sure that the interactive chemistry is responsible here? Either provide some evidence or rephrase as a potential cause, but better still with references (e.g, Chiodo and Polvani, 2016 <https://journals.ametsoc.org/view/journals/clim/29/12/jcli-d-15-0721.1.xml>)

→ We rephrased it because it's hard to find a direct evidence or references for this point.

I295: you say that you use anomalies, however the x-axis units look like it is the absolute values

→ Sorry for the mistake. It's revised.

I306-307: Doesn't EMAC have the cold bias instead of the warm that you mention?

→ Yes, it's the cold bias in the tropical stratosphere.

Figure 11: Again, this is just a lot of empty space, that you want to put to the main text

→ Figure is updated and is moved to the supplement.

I328: "relativley" -> "relatively"

→ Revised.

I352: Please explain what do you mean by a composite here (i.e., max-min differences)

→ Yes, it's a composite difference between the solar maxima and minima. We added an explanation in the revised version. Please see lines 388-389.
